# Supplementary material for: Incidence of human papillomavirus–related cancers among males and females aged 15-34 years in the United States
Source: PubMed Central journal article supplement (PMC10029840; doi:10.1093/jncics/pkad016), 2023-02-23
Supplement: pkad016_supplementary_data.pdf [file pkad016_supplementary_data.pdf]

Supplementary Table 1. Age-adjusted incidence of HPV-related cancers among 15-34 year old males in the US during 2005-2009 and 2015-2019.

|                                         | No. of Cases |           | Incidence (per 1,000,000 person-years) |                 | Rate ratio<br>vs. 2005-2009 |
|-----------------------------------------|--------------|-----------|----------------------------------------|-----------------|-----------------------------|
|                                         | 2005-2009    | 2015-2019 | 2005-2009                              | 2015-2019       |                             |
| Age group                               |              |           |                                        |                 |                             |
| 15-24 years old                         |              |           |                                        |                 |                             |
| HPV-related cancers                     | 93           | 99        | 0.83(0.67-1.02)                        | 0.85(0.69-1.04) | 1.03(0.77-1.38)             |
| Oropharyngeal squamous cell carcinoma   | 17           | 23        | 0.15(0.09-0.24)                        | 0.2(0.13-0.3)   | 1.31(0.67-2.62)             |
| Anal and rectal squamous cell carcinoma | 31           | 47        | 0.28(0.19-0.39)                        | 0.41(0.3-0.54)  | 1.47(0.91-2.39)             |
| Penile squamous cell carcinoma          | 45           | 29        | 0.4(0.29-0.54)                         | 0.25(0.17-0.36) | 0.62(0.38-1.02)             |
| 25-34 years old                         |              |           |                                        |                 |                             |
| HPV-related cancers                     | 670          | 809       | 6.88(6.37-7.43)                        | 7.31(6.81-7.83) | 1.06(0.96-1.18)             |
| Oropharyngeal squamous cell carcinoma   | 209          | 193       | 2.17(1.88-2.48)                        | 1.75(1.51-2.02) | 0.81(0.66-0.99)             |
| Anal and rectal squamous cell carcinoma | 245          | 388       | 2.53(2.22-2.87)                        | 3.51(3.16-3.87) | 1.39(1.18-1.63)             |
| Penile squamous cell carcinoma          | 216          | 228       | 2.19(1.91-2.5)                         | 2.05(1.79-2.33) | 0.94(0.77-1.13)             |

Definitions of HPV-related cancer are as follows. All are histologically confirmed.

Oropharyngeal squamous cell carcinoma: the International Classification of Disease for Oncology, Third Edition (ICD-O-3) site codes C01.9, C02.4, C02.8, C05.1, C05.2, C09.0, C09.1, C09.8, C09.9, C10.0-C10.4, C10.8, C10.9, C14.0, C14.2, and C14.8.

ICD-O-3 histologic codes 8050-8086 and 8120-8131.

Anal and rectal squamous cell carcinoma: ICD-O-3 site codes C20.9, C21.0-C21.2, C21.8. ICD-O-3 histologic codes

8050-8084 and 8120-8131.

Penile squamous cell carcinoma: C60.0-C60.2, C60.8 and C60.9.

ICD-O-3 histologic codes 8050-8084 and 8120-8131. Only female patients are included.
